# Supplementary material
Source: PubMed Central journal article supplement (PMC7780157)
Supplement: NIHMS1651515-supplement-Biochemical_Characterization_of_Yeast_Xrn1_SI.pdf [file NIHMS1651515-supplement-Biochemical_Characterization_of_Yeast_Xrn1_SI.pdf]

## SUPPORTING INFORMATION

for

**Biochemical Characterization of Yeast Xrn1**

Conner J. Langeberg<sup>1</sup>, William R.W. Welch<sup>1</sup>, John V. McGuire<sup>1</sup>, Alison Ashby<sup>1</sup>, Alexander D. Jackson<sup>1</sup>, Erich G. Chapman<sup>1\*</sup>

<sup>1</sup>Department of Chemistry and Biochemistry, University of Denver, Denver, CO 80208, USA

\* email: erich.chapman@du.edu

| Table of Contents:                                                                       | Page: |
|------------------------------------------------------------------------------------------|-------|
| Cover Page.....                                                                          | S1    |
| Table S1: $k_{\text{obs}}$ of Michaelis-Menten style kinesics of ScXrn1 $\Delta$ C ..... | S2    |
| Figure S1: iSpinach $K_d$ .....                                                          | S3    |
| Figure S2: Purification of ScXrn1 $\Delta$ C and BdRppH .....                            | S4    |
| Figure S3: 2° structures of RNA constructs used in this study.....                       | S5    |
| Figure S4: Mutational and pH-dependent thermal denaturation of ScXrn1 $\Delta$ C.....    | S6    |

| [RNA] ( $\mu\text{M}$ ) | $k_{\text{obs}}$ |
|-------------------------|------------------|
| 0.05                    | $0.02 \pm 0.003$ |
| 0.15                    | $0.10 \pm 0.01$  |
| 0.45                    | $0.42 \pm 0.24$  |
| 1.35                    | $1.20 \pm 0.30$  |
| 4.05                    | $1.23 \pm 0.14$  |
| 12.15                   | $2.30 \pm 0.18$  |
| 31.70                   | $17.28 \pm 0.60$ |

**Table S1:  $k_{\text{obs}}$  of Michaelis-Menten style kinetics of ScXrn1 $\Delta$ C.** Observed kinetic rate of ScXrn1 $\Delta$ C obtained using the 5'-monophosphorylated 80HP construct at indicated concentrations. ScXrn1 $\Delta$ C concentration was kept constant at 0.05  $\mu\text{M}$ .  $k_{\text{obs}}$  reported as per phosphodiester bond hydrolysis. The relative stoichiometries of ScXrn1 $\Delta$ C molecules to RNA molecules are as follows: 1:1, 1:3, 1:9, 1:27, 1:81, 1:243, and 1:634. Error reported as 1 standard deviation for n=9 replicates excluding 31.7  $\mu\text{M}$  where n=3.

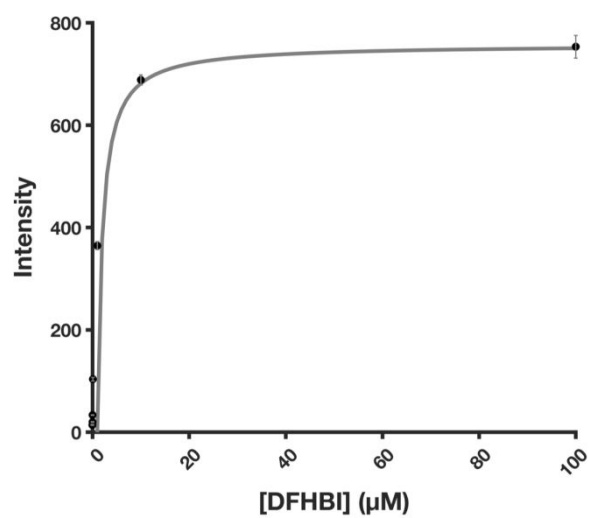

**Figure S1: iSpinach  $K_d$ .** Binding curve of iSpinach aptamer and DFHBI as a function of fluorescence intensity and DFHBI concentration determined using the 80HP construct. The  $K_d$  for the iSpinach aptamer in our system was determined to be  $1.01 \pm 0.1 \mu\text{M}$ . Error reported as 1 standard deviation for  $n=10$  replicates.

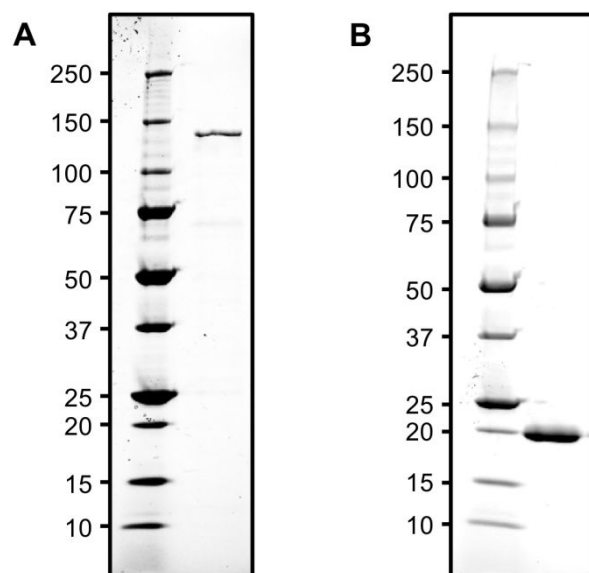

**Figure S2: Purification of ScXrn1 $\Delta$ C and BdRppH.** A) ScXrn1 $\Delta$ C present as a single pure band by SDS-PAGE between the 100 and 150 kDa markers corresponding to the expected 145 kDa mass of the protein. B) BdRppH present as a single pure band by SDS-PAGE at the 20 kDa marker corresponding to the expected 19 kDa mass of the protein.

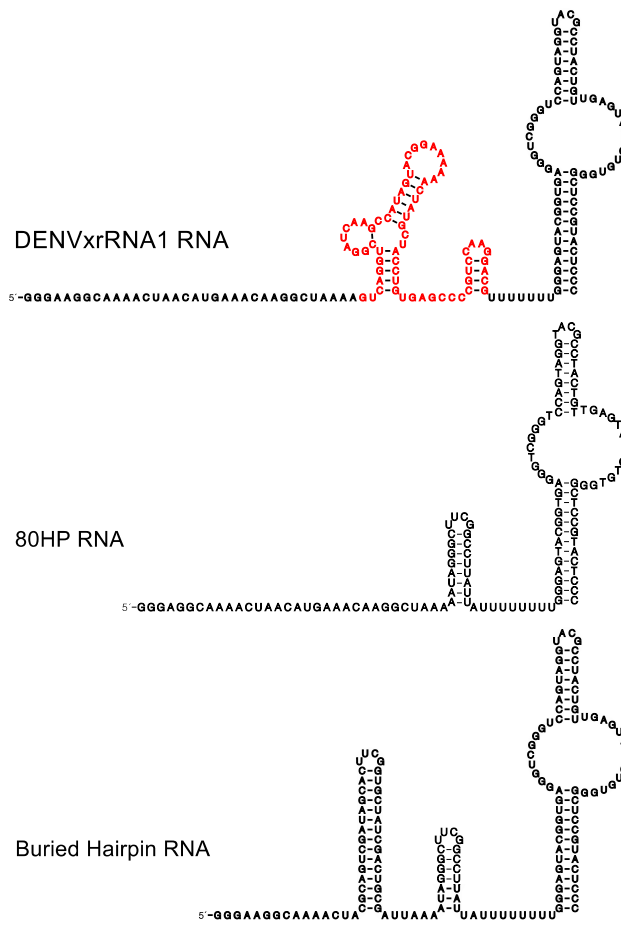

**Figure S3: Secondary Structure of RNA constructs.** Secondary structures of the main RNAs used in this study. Highlighted in red is the Xrn1 resistant structure from the Dengue Virus 3' UTR.

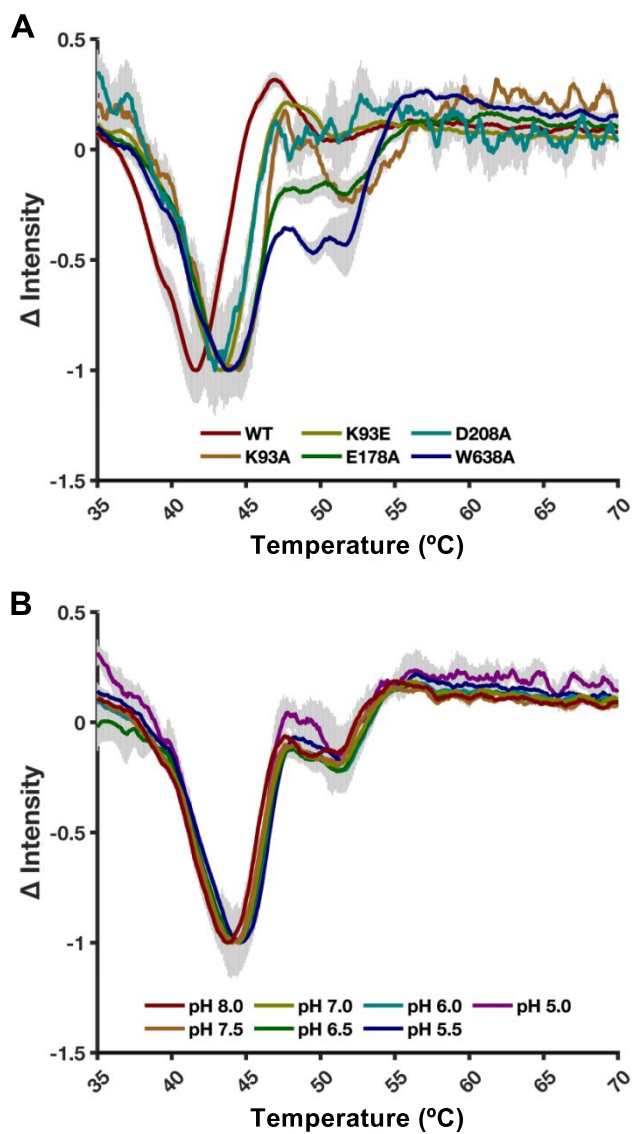

**Figure S4: Mutational and pH-dependent thermal denaturation of ScXrn1 $\Delta$ C.** A) Thermal denaturation experiments of ScXrn1 $\Delta$ C and indicated point mutants. B) Thermal denaturation experiments with the wild-type ScXrn1 $\Delta$ C conducted at varying pH. Error in each experiment is reported as 1 standard deviation for n=3 replicates.
